# Supplementary material
Source: MDPI journal article supplement (https://www.mdpi.com/2409-515X/9/3/48)
Supplement: s1 [file s1]

## Supplementary Material

**Table S1.** Acylcarnitine concentrations (μmol/L) and genetic data of the study cohort

| Patient | Sex | Age at blood collection (rationale) | C0     | C16   | C16:1OH | C16OH | C18:1OH | C18OH | “HADHA ratio” | C16OH/C16 | Genotype                                          |
|---------|-----|-------------------------------------|--------|-------|---------|-------|---------|-------|---------------|-----------|---------------------------------------------------|
| 1       | M   | 4 days (initial clinical symptoms)  | 35,3   | 2,64  | 0,156   | 1,09  | 0,547   | 1,03  | 0,076         | 0,413     | c.1528G>C, (p.Glu510Gln) homo                     |
| 2       | F   | 4 days (initial clinical symptoms)  | 58,1   | 2,11  | 0,086   | 0,863 | 0,666   | 1,05  | 0,044         | 0,409     | c.1528G>C, (p.Glu510Gln) homo                     |
| 3       | M   | 4 days (initial clinical symptoms)  | 43,6   | 3,82  | 0,554   | 1,97  | 2,03    | 2,29  | 0,144         | 0,516     | c.1528G>C, (p.Glu510Gln) homo                     |
| 4       | F   | 7 days (initial clinical symptoms)  | 43,5   | 3,17  | 0,44    | 1,36  | 0,776   | 0,899 | 0,070         | 0,429     | c.1528G>C,<br>(p.Glu510Gln)/c.2112_2114dup        |
| 5       | M   | 7 days (initial clinical symptoms)  | 20,1   | 2,24  | 0,142   | 0,745 | 0,791   | 0,452 | 0,099         | 0,333     | c.1528G>C, (p.Glu510Gln) homo                     |
| 6       | M   | 1 month (asymptomatic)              | 10,581 | 1,104 | 0,089   | 0,209 | 0,117   | 0,175 | 0,047         | 0,189     | c.1528G>C, (p.Glu510Gln)/ c.67G>C<br>(p.Gly23Arg) |

|    |   |                                            |        |       |       |       |       |       |       |       |                                                                      |
|----|---|--------------------------------------------|--------|-------|-------|-------|-------|-------|-------|-------|----------------------------------------------------------------------|
| 7  | F | 20 days (asymptomatic)                     | 24,642 | 4,079 | 0,331 | 1,749 | 1,275 | 1,685 | 0,191 | 0,429 | c.1528G>C, (p.Glu510Gln) homo                                        |
| 8  | M | 1 month (initial clinical symptoms)        | 22,124 | 0,954 | 0,131 | 0,506 | 0,612 | 0,742 | 0,084 | 0,530 | c.1528G>C, (p.Glu510Gln) homo                                        |
| 9  | M | 2 months (metabolic decompensation)        | 53,975 | 1,929 | 0,366 | 1,31  | 1,366 | 1,597 | 0,079 | 0,679 | c.1528G>C, (p.Glu510Gln) homo                                        |
| 10 | F | 10 days (neonatal screening, asymptomatic) | 12,696 | 0,963 | 0,108 | 0,398 | 0,246 | 0,25  | 0,07  | 0,413 | c.1528G>C, (p.Glu510Gln) homo                                        |
| 11 | M | 3 months (metabolic crisis)                | 3,7    | 1,18  | 0,169 | 0     | 0,202 | 0,322 | 0,142 | 0,000 | c.1528G>C, (p.Glu510Gln)/<br>c.1750_1772del<br>(p.Ala584TrpfsTerm40) |
| 12 | M | 3 months (metabolic crisis)                | 11,427 | 1,082 | 0,243 | 0,752 | 0,707 | 0,771 | 0,195 | 0,695 | c.1528G>C, (p.Glu510Gln) homo                                        |
| 13 | F | 4 months (metabolic crisis)                | 5,306  | 1,665 | 0,168 | 0,59  | 0,677 | 0,37  | 0,308 | 0,354 | c.1528G>C, (p.Glu510Gln) homo                                        |
| 14 | M | 4 months (metabolic crisis)                | 7,32   | 0,924 | 0,179 | 0,447 | 0,474 | 0,498 | 0,194 | 0,484 | c.1528G>C, (p.Glu510Gln)/ c.871C>T<br>(p.Arg291Term)                 |

|    |   |                                                        |         |        |       |        |       |        |       |       |                                     |
|----|---|--------------------------------------------------------|---------|--------|-------|--------|-------|--------|-------|-------|-------------------------------------|
| 15 | F | 5 months (metabolic crisis)                            | 26,01   | 2,397  | 0,563 | 1,5    | 2,435 | 2,17   | 0,235 | 0,626 | c.1528G>C, (p.Glu510Gln)/ c.1493A>G |
| 16 | M | 3 months (clinical symptoms)                           | 11,837  | 1,681  | 0,285 | 0,776  | 1,139 | 0,715  | 0,222 | 0,462 | c.1528G>C, (p.Glu510Gln) homo       |
| 17 | M | 5 months (metabolic crisis, L-carnitine therapy)       | 384,663 | 11,849 | 3,49  | 16,374 | 13,29 | 11,017 | 0,106 | 1,382 | c.1528G>C, (p.Glu510Gln) homo       |
| 18 | M | 5 months (clinical symptoms)                           | 9,073   | 0,947  | 0,211 | 0,692  | 1,114 | 0,623  | 0,268 | 0,731 | c.1528G>C, (p.Glu510Gln) homo       |
| 19 | M | 6 months (clinical symptoms, metabolic decompensation) | 3,13    | 0,456  | 0     | 0,228  | 0,336 | 0,432  | 0,318 | 0,500 | c.1528G>C, (p.Glu510Gln) homo       |
| 20 | F | 6 months (metabolic crisis)                            | 17,976  | 2,676  | 0,5   | 0,881  | 1,773 | 1,074  | 0,207 | 0,329 | c.1528G>C, (p.Glu510Gln) homo       |
| 21 | M | 6 months (metabolic crisis)                            | 5,274   | 1,504  | 0,181 | 0,494  | 0,637 | 0,546  | 0,318 | 0,328 | c.1528G>C, (p.Glu510Gln) homo       |
| 22 | M | 6 months (clinical symptoms, metabolic                 | 3,581   | 0,616  | 0,086 | 0,217  | 0,345 | 0,239  | 0,224 | 0,352 | c.1528G>C, (p.Glu510Gln) homo       |

|    |   |                              |        |       |       |       |       |       |       |       |                                                               |
|----|---|------------------------------|--------|-------|-------|-------|-------|-------|-------|-------|---------------------------------------------------------------|
|    |   | decompensation)              |        |       |       |       |       |       |       |       |                                                               |
| 23 | M | 6 months (clinical symptoms) | 18,301 | 1,923 | 0,146 | 0,495 | 0,466 | 0,508 | 0,08  | 0,257 | c.1528G>C, (p.Glu510Gln) homo                                 |
| 24 | F | 6 months (metabolic crisis)  | 3,323  | 0,964 | 0,175 | 0,453 | 0,514 | 0,456 | 0,428 | 0,470 | c.1528G>C, (p.Glu510Gln) homo                                 |
| 25 | M | 6 months (clinical symptoms) | 35,8   | 4,127 | 0,446 | 1,669 | 0,889 | 0,577 | 0,088 | 0,404 | c.2026C>T, (p.Arg676Cys)/<br>c.2134_2138dupCCTTG (p.Gly715fs) |
| 26 | M | 6 months (clinical symptoms) | 16,271 | 2,623 | 0,298 | 0,721 | 0,655 | 0,491 | 0,115 | 0,275 | c.1528G>C, (p.Glu510Gln) homo                                 |
| 27 | M | 7 months (metabolic crisis)  | 2,275  | 0,605 | 0,354 | 0,428 | 0,432 | 0,391 | 0,55  | 0,707 | c.1528G>C, (p.Glu510Gln)/ -**                                 |
| 28 | M | 6 months (metabolic crisis)  | 3,933  | 1,243 | 0,226 | 0,798 | 1,157 | 0,342 | 0,584 | 0,642 | c.1528G>C, (p.Glu510Gln) homo                                 |
| 29 | M | 7 months (clinical symptoms) | 11,114 | 1,695 | 0,39  | 1,018 | 1,559 | 0,64  | 0,289 | 0,601 | c.1528G>C, (p.Glu510Gln) homo                                 |
| 30 | M | 7 months (clinical           | 5,765  | 1,127 | 0,172 | 0,345 | 0,706 | 0,7   | 0,304 | 0,306 | c.1528G>C, (p.Glu510Gln) homo                                 |

|    |   |                              |        |       |       |       |       |       |       |       |                                                |
|----|---|------------------------------|--------|-------|-------|-------|-------|-------|-------|-------|------------------------------------------------|
|    |   | symptoms)                    |        |       |       |       |       |       |       |       |                                                |
| 31 | F | 7 months (clinical symptoms) | 3,934  | 1,186 | 0,181 | 0,498 | 0,757 | 0,647 | 0,483 | 0,420 | c.1528G>C, (p.Glu510Gln) homo                  |
| 32 | F | 7 months (metabolic crisis)  | 6,364  | 1,507 | 0,265 | 0,933 | 0,898 | 0,888 | 0,427 | 0,619 | c.1528G>C, (p.Glu510Gln) homo                  |
| 33 | M | 4 days (metabolic crisis)    | 43,105 | 5,077 | 0,251 | 0,76  | 0,369 | 0,406 | 0,036 | 0,150 | c.1528G>C, (p.Glu510Gln)/ -**                  |
| 34 | F | 8 months (clinical symptoms) | 8,94   | 0,704 | 0     | 0,217 | 0,289 | 0,505 | 0,113 | 0,308 | c.1528G>C, (p.Glu510Gln) homo                  |
| 35 | M | 8 months (clinical symptoms) | 5,7    | 0,469 | 0     | 0,073 | 0,12  | 0,12  | 0,055 | 0,167 | c.1528G>C, (p.Glu510Gln) homo                  |
| 36 | F | 8 months (clinical symptoms) | 5,466  | 0,796 | 0,255 | 0,47  | 1,027 | 0,696 | 0,401 | 0,590 | c.1528G>C, (p.Glu510Gln) homo                  |
| 37 | M | 8 months (clinical symptoms) | 7,44   | 1,73  | 0,141 | 0,424 | 0,661 | 0,418 | 0,202 | 0,245 | c.1528G>C, (p.Glu510Gln) homo                  |
| 38 | M | 8 months (clinical symptoms) | 14,688 | 0,557 | 0,111 | 0,241 | 0,219 | 0,154 | 0,042 | 0,433 | c.1528G>C, (p.Glu510Gln)/ c.67G>C (p.Gly23Arg) |

|    |   |                              |        |       |       |       |       |       |       |       |                               |
|----|---|------------------------------|--------|-------|-------|-------|-------|-------|-------|-------|-------------------------------|
| 39 | F | 8 months (clinical symptoms) | 2,69   | 0,308 | 0,078 | 0,157 | 0,342 | 0,184 | 0,254 | 0,510 | c.1528G>C, (p.Glu510Gln) homo |
| 40 | F | 8 months (clinical symptoms) | 4,511  | 0,789 | 0,108 | 0,203 | 0,501 | 0,252 | 0,212 | 0,257 | c.1528G>C, (p.Glu510Gln) homo |
| 41 | F | 9 months (clinical symptoms) | 2,875  | 0,292 | 0,033 | 0,084 | 0,073 | 0,044 | 0,07  | 0,288 | c.1528G>C, (p.Glu510Gln) homo |
| 42 | M | 9 months (clinical symptoms) | 41,42  | 2,3   | 0,478 | 1,62  | 2,093 | 2,006 | 0,138 | 0,704 | c.1528G>C, (p.Glu510Gln)/ -** |
| 43 | M | 9 months (clinical symptoms) | 2,463  | 0,357 | 0,094 | 0,182 | 0,393 | 0,178 | 0,305 | 0,510 | c.1528G>C, (p.Glu510Gln) homo |
| 44 | M | 9 months (clinical symptoms) | 6,146  | 0,387 | 0,07  | 0,239 | 0,405 | 0,408 | 0,171 | 0,618 | c.1528G>C, (p.Glu510Gln) homo |
| 45 | M | 7 months (clinical symptoms) | 11,611 | 0,369 | 0     | 0,114 | 0,354 | 0,236 | 0,061 | 0,309 | c.1528G>C, (p.Glu510Gln) homo |
| 46 | F | 7 months (clinical symptoms) | 35,2   | 1,58  | 0     | 0,542 | 0,643 | 0,778 | 0,056 | 0,343 | c.1528G>C, (p.Glu510Gln) homo |

|    |   |                                                       |        |       |       |       |       |       |       |       |                                                  |
|----|---|-------------------------------------------------------|--------|-------|-------|-------|-------|-------|-------|-------|--------------------------------------------------|
| 47 | F | 10 months (clinical symptoms)                         | 45,7   | 5,08  | 0,425 | 1,91  | 1,06  | 1,73  | 0,103 | 0,376 | c.1528G>C, (p.Glu510Gln)/ -**                    |
| 48 | M | 5 days (no symptoms)                                  | 23,742 | 3,897 | 0,101 | 0,402 | 0,224 | 0,505 | 0,048 | 0,511 | c.1528G>C, (p.Glu510Gln) homo                    |
| 49 | M | 10 months (metabolic crisis)                          | 3,439  | 0,438 | 0,08  | 0,145 | 0,278 | 0,216 | 0,186 | 0,331 | c.1528G>C, (p.Glu510Gln) homo                    |
| 50 | M | 10 months (clinical symptoms)                         | 14,064 | 1,506 | 0,414 | 1,205 | 3,132 | 1,282 | 0,400 | 0,800 | c.1528G>C, (p.Glu510Gln) homo                    |
| 51 | F | 10 months (clinical symptoms)                         | 8,103  | 0,718 | 0,093 | 0,204 | 0,392 | 0,239 | 0,103 | 0,284 | c.1528G>C, (p.Glu510Gln) homo                    |
| 52 | M | 85 months (clinical symptoms)                         | 7,283  | 0,539 | 0,064 | 0,09  | 0,08  | 0,135 | 0,042 | 0,167 | c.1528G>C, (p.Glu510Gln) homo                    |
| 53 | M | 166 months (metabolic decompensation, rhabdomyolysis) | 32,9   | 0,882 | 0,060 | 0,261 | 0,357 | 0,524 | 0,035 | 0,296 | c.1528G>C, (p.Glu510Gln)/ c.482C>A (p.Ala161Glu) |
| 54 | M | 318 months (clinical symptoms)                        | 5,75   | 1,22  | 0,279 | 0,768 | 0,511 | 0,316 | 0,277 | 0,630 | c.1528G>C, (p.Glu510Gln) homo                    |

|    |        |            |        |        |        |        |         |        |  |
|----|--------|------------|--------|--------|--------|--------|---------|--------|--|
| RI | 8 – 90 | 0,11 - 6,3 | < 0.22 | < 0.18 | < 0.16 | < 0.15 | < 0.027 | < 0.1* |  |
|----|--------|------------|--------|--------|--------|--------|---------|--------|--|

Symbols and abbreviations are as follows: “HADHA ratio” = (C16OH + C18OH + C18:1OH)/C0; RI = reference intervals; \*\* = unidentified mutation due to a refusal of a patient’s parents/ legal guardian to proceed the research due to the patient’s death. \* = values taken from McHugh and coauthors [26]. Control group genotyping was not performed.

**Table S2.** Clinical data of the study cohort

| Patient | Sex | Age at diagnosis (months) | Age at death (months) | Family history                                            | First symptoms                  | Phenotype (according to the age of onset and disease severity) | Main clinical symptoms                                                                |
|---------|-----|---------------------------|-----------------------|-----------------------------------------------------------|---------------------------------|----------------------------------------------------------------|---------------------------------------------------------------------------------------|
| 1       | M   | Retrospective diagnosis   | 8                     | Positive (two affected siblings - patients 1 and 2)       | Within the first 24 h of life   | Severe                                                         | Hypoglycemia, cardiomyopathy, hepatic impairment, sudden infant death syndrome (SIDS) |
| 2       | F   | Retrospective diagnosis   | 7                     | Positive (two affected siblings - patients 1 and 2)       | Within the first 24 h of life   | Severe                                                         | Hypoglycemia, hypotonia, cramps, anemia                                               |
| 3       | M   | 1                         | 1                     | Unknown                                                   | Within the first 24 h of life   | Severe                                                         | Hypoglycemia, hypotonia, cramps                                                       |
| 4       | F   | 1                         | 1                     | Negative                                                  | Within the first 24 h of life   | Severe                                                         | Hypoglycemia, hypotonia, cramps                                                       |
| 5       | M   | 1                         | Alive                 | Positive (the sibling died within the first year of life) | Within the first months of life | Intermediate (precipitated by infection)                       | Hypoglycemia, hypotonia, cramps, symptom improvement after therapy                    |



|    |   |             |         |                                                                          |                                                                                       |                                          |                                                                                     |
|----|---|-------------|---------|--------------------------------------------------------------------------|---------------------------------------------------------------------------------------|------------------------------------------|-------------------------------------------------------------------------------------|
| 6  | M | 8           | Alive   | Negative                                                                 | At the age of 7 months - hypotonia, hepatic cytolysis, disorders of consciousness     | Intermediate (precipitated by infection) | Hypoglycemia, hepatic impairment (hepatomegaly, hepatic cytolysis), hypotonia       |
| 7  | F | 7           | Unknown | Negative                                                                 | At the age of 7 months - hypoglycemia                                                 | Intermediate (precipitated by infection) | Hypoglycemia, cramps, hypotonia, hepatomegaly, hepatic cytolysis                    |
| 8  | M | 1           | 6       | Negative                                                                 | Within the first months of life - hypoglycemia, hepatic cytolysis                     | Severe                                   | Hypoglycemia, cramps, hypotonia, hepatomegaly, hepatic cytolysis, cardiomyopathy    |
| 9  | M | 2           | Alive   | Negative                                                                 | Within the first 24 h of life - respiratory disorders, hypotonia                      | Severe                                   | Hypoglycemia, dilated cardiomyopathy, anemia                                        |
| 10 | F | 0 (10 days) | Alive   | Negative                                                                 | Preclinical stage (diagnosed by neonatal screening)                                   | Asymptomatic                             | No symptoms. The patient is receiving therapy                                       |
| 11 | M | 2           | 3       | Unknown                                                                  | Within the first months of life - hepatic impairment, hepatic cytolysis, hypoglycemia | Severe                                   | Hypoglycemia, hepatic cytolysis, hypocoagulation                                    |
| 12 | M | 3           | 3       | Unknown                                                                  | Unknown                                                                               | Severe                                   | Hypoglycemia, hepatic impairment (hepatomegaly, hepatic cytolysis), hypotonia       |
| 13 | F | 4           | Unknown | Positive (the sibling died of hepatic impairment at the age of 7 months) | Since birth - mild regurgitation. At the age of 3 months - vomiting, hypoglycemia     | Severe                                   | Hypoglycemia, hypotonia, cardiomyopathy, hepatic cytolysis, anemia, hypocoagulation |

|    |   |                         |         |                                                                                               |                                                                  |                                          |                                                                                                                          |
|----|---|-------------------------|---------|-----------------------------------------------------------------------------------------------|------------------------------------------------------------------|------------------------------------------|--------------------------------------------------------------------------------------------------------------------------|
| 14 | M | 4                       | Alive   | Positive (two siblings, twins). The boy and girl died in 8 and 14 h after birth, respectively | At the age of 3 months - cramps, prolonged apnea                 | Severe                                   | Hypotonia, hepatomegaly, hypoglycemia, cardiomyopathy, hepatic cytolysis                                                 |
| 15 | F | 5                       | Unknown | Negative                                                                                      | At the age of 5 months - lethargy, vomiting                      | Intermediate (precipitated by infection) | Hypotonia, hepatomegaly, hypoglycemia, cardiomyopathy, hepatic cytolysis                                                 |
| 16 | M | 5                       | Alive   | Negative                                                                                      | At the age of 5 months - hepatomegaly                            | Intermediate (precipitated by infection) | Hepatomegaly, hepatic cytolysis, anemia                                                                                  |
| 17 | M | 5                       | 5       | Positive (the sibling died at the age of 6 months)                                            | At the age of 4 days - enterocolitis with intestinal perforation | Intermediate (precipitated by infection) | Increased lactate level, cardiomyopathy, myocardial hypertrophy, hypoglycemia, hypocoagulation, hepatic cytolysis        |
| 18 | M | Retrospective diagnosis | 6       | Positive (sibling)                                                                            | Within the first days of life - hypoglycemia, hepatic cytolysis  | Intermediate (precipitated by infection) | Hypoglycemia, hepatic cytolysis, cardiomyopathy                                                                          |
| 19 | M | 6                       | Unknown | Unknown                                                                                       | Hypoglycemia, hepatic cytolysis                                  | Intermediate (precipitated by infection) | Hypoglycemia, hypotonia, cardiomyopathy, hepatic cytolysis                                                               |
| 20 | F | 6                       | 7       | Negative                                                                                      | At the age of 6 months - hypoglycemia, hepatic impairment        | Intermediate (precipitated by infection) | Hypoglycemia, disorders of consciousness, hypotonia, cardiomyopathy, lactic acidosis, hepatic cytolysis, hypocoagulation |
| 21 | M | 6                       | 6       | Unknown                                                                                       | At the age of 6 months - hypoglycemia, hepatic cytolysis         | Intermediate (precipitated by infection) | Hepatic impairment, hepatic cytolysis                                                                                    |

|    |   |   |         |          |                                                                                                   |                                          |                                                                     |
|----|---|---|---------|----------|---------------------------------------------------------------------------------------------------|------------------------------------------|---------------------------------------------------------------------|
| 22 | M | 6 | Alive   | Negative | Within the first days of life - jaundice. At the age of 6 months - developmental delay, hypotonia | Intermediate (precipitated by infection) | Hypoglycemia, epilepsy, motor impairment                            |
| 23 | M | 6 | Unknown | Unknown  | Unknown                                                                                           | Intermediate (precipitated by infection) | hepatic impairment, hepatic cytolysis                               |
| 24 | F | 6 | 6       | Negative | At the age of 6 months - hypoglycemia, coma                                                       | Intermediate (precipitated by infection) | Hypotonia, disorders of consciousness, hypoglycemia, cardiomyopathy |
| 25 | M | 6 | 6       | Unknown  | Unknown                                                                                           | Intermediate (precipitated by infection) | Hypoglycemia, cardiomyopathy, hypotonia                             |
| 26 | M | 7 | Unknown | Unknown  | Unknown                                                                                           | Intermediate (precipitated by infection) | Unknown                                                             |
| 27 | M | 7 | Unknown | Negative | At the age of 4 months - occasional vomiting, cramps                                              | Intermediate (precipitated by infection) | Hypotonia, hepatomegaly, hypoglycemia, hepatic cytolysis            |
| 28 | M | 7 | 7       | Unknown  | Unknown                                                                                           | Intermediate (precipitated by infection) | Hypoglycemia, hepatic cytolysis                                     |
| 29 | M | 7 | Unknown | Unknown  | Unknown                                                                                           | Intermediate (precipitated by infection) | Hepatomegaly, hepatic cytolysis                                     |

|    |   |                            |            |                                                                             |                                                                           |                                                |                                                                                                     |
|----|---|----------------------------|------------|-----------------------------------------------------------------------------|---------------------------------------------------------------------------|------------------------------------------------|-----------------------------------------------------------------------------------------------------|
| 30 | M | 7                          | Unknown    | Unknown                                                                     | Unknown                                                                   | Intermediate<br>(precipitated by<br>infection) | Hepatomegaly, hepatic cytolysis                                                                     |
| 31 | F | 7                          | 7          | Negative                                                                    | At the age of 7 months -<br>hypoglycemia                                  | Intermediate<br>(precipitated by<br>infection) | Hypoglycemia, hepatic impairment<br>(hepatomegaly, hepatic cytolysis),<br>hypotonia                 |
| 32 | F | 7                          | 7          | Negative                                                                    | At the age of 7 months -<br>hypoglycemia                                  | Intermediate<br>(precipitated by<br>infection) | Hypoglycemia, hepatic impairment<br>(hepatomegaly, hepatic cytolysis),<br>hypotonia, cardiomyopathy |
| 33 | M | Retrospective<br>diagnosis | 0 (5 days) | Negative                                                                    | At the age of 3 days -<br>disorders of consciousness                      | Severe                                         | Hypotonia, disorders of consciousness,<br>cardiomyopathy                                            |
| 34 | F | 8                          | 8          | Positive (the sibling died<br>of Reye's syndrome at the<br>age of 6 months) | At the age of 6 months -<br>increased levels of<br>transaminases          | Intermediate<br>(precipitated by<br>infection) | Hypotonia, hepatomegaly,<br>hypoglycemia, cardiomyopathy, hepatic<br>cytolysis                      |
| 35 | M | 8                          | Alive      | Negative                                                                    | At the age of 8 months -<br>hypoglycemia, hepatic<br>cytolysis            | Intermediate<br>(precipitated by<br>infection) | Hypoglycemia, hepatic impairment<br>(hepatomegaly, hepatic cytolysis),<br>hypotonia                 |
| 36 | F | 8                          | 8          | Negative                                                                    | At the age of 8 months -<br>hypotonia, hepatomegaly,<br>hepatic cytolysis | Intermediate<br>(precipitated by<br>infection) | Hypoglycemia, hepatic impairment<br>(hepatomegaly, hepatic cytolysis),<br>hypotonia, cardiomyopathy |
| 37 | M | 8                          | Unknown    | Unknown                                                                     | Unknown                                                                   | Intermediate<br>(precipitated by<br>infection) | Hypotonia, hypoglycemia,<br>hepatomegaly                                                            |
| 38 | M | 8                          | 8          | Positive                                                                    | At the age of 7 months -                                                  | Intermediate<br>(precipitated by               | Hypotonia, hepatomegaly,<br>hypoglycemia, cardiomyopathy, hepatic                                   |

|    |   |    |         |                                                            |                                                                                               |                                          |                                                                                                   |
|----|---|----|---------|------------------------------------------------------------|-----------------------------------------------------------------------------------------------|------------------------------------------|---------------------------------------------------------------------------------------------------|
|    |   |    |         |                                                            | muscle weakness                                                                               | infection)                               | cytolysis                                                                                         |
| 39 | F | 8  | Alive   | Negative                                                   | At the age of 5 days - hypoglycemia. At the age of 7 months - hypoglycemia, hepatic cytolysis | Severe                                   | Hepatomegaly, hepatic cytolysis, hypoproteinemia, hypoglycemia, anemia, hypotonia, cardiomyopathy |
| 40 | F | 8  | 8       | Negative                                                   | At the age of 9 months - hypoglycemia, hepatic cytolysis                                      | Intermediate (precipitated by infection) | At the age of 8 months - hypoglycemia, hepatomegaly, hepatic cytolysis                            |
| 41 | F | 9  | Alive   | Positive (the sibling died within the first month of life) | At the age of 9 months - hypoglycemia                                                         | Intermediate (precipitated by infection) | Hypoglycemia, hepatic impairment (hepatomegaly, hepatic cytolysis), hypotonia                     |
| 42 | M | 9  | Alive   | Positive (the sibling died at the age of 8 months)         | At the age of 9 months - hepatomegaly, hepatic cytolysis, hypotonia                           | Intermediate (precipitated by infection) | Hypoglycemia, hepatic impairment (hepatomegaly, hepatic cytolysis), anemia, hypotonia             |
| 43 | M | 9  | Alive   | Negative                                                   | At the age of 4 months - food refusal, hepatic cytolysis                                      | Intermediate (precipitated by infection) | Hepatic cytolysis, anemia, motor impairment, hypotonia, duodenal atresia                          |
| 44 | M | 9  | Unknown | Unknown                                                    | Unknown                                                                                       | Intermediate (precipitated by infection) | Hypoglycemia, hepatic impairment (hepatomegaly, hepatic cytolysis), hypotonia                     |
| 45 | M | 7  | Alive   | Negative                                                   | At the age of 7 months – hypoglycemia                                                         | Intermediate (precipitated by infection) | Hypoglycemia, hepatic impairment (hepatomegaly, hepatic cytolysis), hypotonia                     |
| 46 | F | 10 | 13      | Negative                                                   | At the age of 9 months - hepatic cytolysis,                                                   | Intermediate (precipitated by            | Hypoglycemia, hepatic impairment (hepatomegaly, hepatic cytolysis),                               |

|    |   |            |         |                                                                 |                                                                          |                                                |                                                                                                                                                     |
|----|---|------------|---------|-----------------------------------------------------------------|--------------------------------------------------------------------------|------------------------------------------------|-----------------------------------------------------------------------------------------------------------------------------------------------------|
|    |   |            |         |                                                                 | hepatomegaly, hypotonia                                                  | infection)                                     | hypotonia, cardiomyopathy                                                                                                                           |
| 47 | F | 10         | Unknown | Unknown                                                         | Unknown                                                                  | Intermediate<br>(precipitated by<br>infection) | Hepatic impairment, hypoglycemia                                                                                                                    |
| 48 | M | 0 (4 days) | Alive   | Positive (the sibling died<br>within the first year of<br>life) | No symptoms. The patient is<br>receiving therapy since birth             | Asymptomatic                                   | No symptoms. The patient is receiving<br>therapy                                                                                                    |
| 49 | M | 10         | Alive   | Negative                                                        | At the age of 8 months -<br>hypoglycemia, hepatomegaly                   | Intermediate<br>(precipitated by<br>infection) | Hepatomegaly, hepatic cytolysis,<br>hypoglycemia, metabolic acidosis,                                                                               |
| 50 | M | 11         | Unknown | Unknown                                                         | Unknown                                                                  | Intermediate<br>(precipitated by<br>infection) | Hypoglycemia, hepatic impairment<br>(hepatomegaly, hepatic cytolysis),<br>hypotonia                                                                 |
| 51 | F | 11         | Alive   | Negative                                                        | At the age of 10 months -<br>disorders of consciousness,<br>hypoglycemia | Intermediate<br>(precipitated by<br>infection) | Hypoglycemia, hepatic impairment<br>(hepatomegaly, hepatic cytolysis),<br>anemia, hypotonia                                                         |
| 52 | M | 85         | Unknown | Unknown                                                         | Muscle weakness                                                          | Mild                                           | Chronic. Rhabdomyolysis, muscle<br>weakness                                                                                                         |
| 53 | M | 166,1      | Alive   | Negative                                                        | At the age of 2 months -<br>hypoglycemia                                 | Mild                                           | Below 15 years of age - two episodes of<br>hypoglycemia and cardiomyopathy. At<br>the age of 15 - metabolic crisis,<br>hypoglycemia, rhabdomyolysis |
| 54 | M | 318        | Unknown | Unknown                                                         | Muscle weakness                                                          | Mild                                           | Rhabdomyolysis, muscle weakness                                                                                                                     |
